# Supplementary material for: Livestock-Associated, Antibiotic-Resistant Staphylococcus aureus Nasal Carriage and Recent Skin and Soft Tissue Infection among Industrial Hog Operation Workers
Source: PLoS One. 2016 Nov 16;11(11):e0165713. doi: 10.1371/journal.pone.0165713 (PMC5112983; doi:10.1371/journal.pone.0165713)
Supplement: S1 Appendix — (XLSX) [file pone.0165713.s001.xlsx]

## Sheet: Dataset
HHID	INDID	SpaType	Saureus	MRSA	SCN	MDRSA	MXF	CEF	CLI	Dap	ERY	GEN	LZD	NIT	RIF	SYN	SXT	TET	MNO	VAN	OXA	AMP	PEN	Type	Mask	Staph	Boil	Absces	Pimple	Spider	DocStaph	SSTI
1	1	.	0	0	0	0	.	.	.	.	.	.	.	.	.	.	.	.	.	.	.	.	.	Worker	.	0	0	0	0	0	.	0
2	2	.	0	0	0	0	.	.	.	.	.	.	.	.	.	.	.	.	.	.	.	.	.	Worker	1	0	0	0	0	0	0	0
2	3	t148	1	0	1	1	S	S	R	S	R	S	S	S	S	S	S	S	S	S	S	R	R	Minor	.	0	0	0	0	0	0	0
2	4	t4976	1	0	1	0	S	S	S	S	S	S	S	S	S	S	S	S	S	S	S	S	S	Minor	.	0	0	0	0	0	0	0
3	5	t692	1	0	1	0	S	S	S	S	S	S	S	S	S	S	S	S	S	S	S	R	R	Worker	1	0	0	0	0	0	0	0
4	6	t571	1	0	0	1	S	S	R	S	R	S	S	S	S	R	S	R	I	S	S	R	R	Worker	2	0	0	0	0	0	0	0
4	7	t021	1	0	0	1	S	S	R	S	R	S	S	S	S	S	S	S	S	S	S	R	R	Minor	.	0	0	0	0	0	0	0
5	8	t002	1	0	0	1	S	S	R	S	R	S	S	S	S	R	S	R	R	S	S	R	R	Worker	2	0	1	0	0	0	0	1
5	9	t034	1	0	0	0	S	S	S	S	S	S	S	S	S	S	S	R	I	S	S	R	R	Adult	.	0	0	0	0	0	0	0
5	10	t089	1	0	1	0	S	S	S	S	S	S	S	S	S	S	S	S	S	S	S	R	R	Minor	.	0	0	0	0	0	0	0
6	11	.	0	0	0	0	.	.	.	.	.	.	.	.	.	.	.	.	.	.	.	.	.	Worker	1	0	0	0	0	0	0	0
7	12	.	0	0	0	0	.	.	.	.	.	.	.	.	.	.	.	.	.	.	.	.	.	Worker	0	0	0	0	0	0	0	0
7	13	.	0	0	0	0	.	.	.	.	.	.	.	.	.	.	.	.	.	.	.	.	.	Minor	.	0	0	0	0	0	0	0
7	14	t688	1	0	1	0	S	S	S	S	S	S	S	S	S	S	S	S	S	S	S	R	R	Minor	.	1	0	0	1	0	0	1
8	15	.	0	0	0	0	.	.	.	.	.	.	.	.	.	.	.	.	.	.	.	.	.	Worker	2	0	0	0	0	0	0	0
8	16	t645	1	0	1	0	S	S	S	S	I	S	S	S	S	S	S	S	S	S	S	R	R	Worker	1	0	0	0	0	0	0	0
8	17	t645	1	0	1	0	S	S	S	S	S	S	S	S	S	S	S	S	S	S	S	R	R	Minor	.	0	0	0	0	0	0	0
9	18	t008	1	0	1	0	R	S	S	S	S	S	S	S	S	S	S	S	S	S	S	S	S	Worker	0	0	0	0	0	0	0	0
9	19	.	0	0	0	0	.	.	.	.	.	.	.	.	.	.	.	.	.	.	.	.	.	Minor	.	0	0	0	0	0	0	0
10	20	t065	1	0	1	0	S	S	S	S	S	S	S	S	S	S	S	S	S	S	S	R	R	Worker	0	0	0	0	0	0	0	0
10	21	t018	1	0	1	1	S	S	R	S	R	S	S	S	S	S	S	S	S	S	S	R	R	Worker	0	0	0	0	0	0	0	0
10	22	.	0	0	0	0	.	.	.	.	.	.	.	.	.	.	.	.	.	.	.	.	.	Minor	.	0	0	0	0	0	0	0
11	23	.	0	0	0	0	.	.	.	.	.	.	.	.	.	.	.	.	.	.	.	.	.	Worker	0	0	0	0	0	0	0	0
11	24	.	0	0	0	0	.	.	.	.	.	.	.	.	.	.	.	.	.	.	.	.	.	Adult	.	0	0	0	0	0	0	0
11	25	.	0	0	0	0	.	.	.	.	.	.	.	.	.	.	.	.	.	.	.	.	.	Minor	.	0	0	0	0	0	0	0
12	26	t337	1	0	0	1	R	S	R	S	R	S	S	S	S	S	S	S	S	S	S	R	R	Worker	1	1	1	0	0	0	0	1
12	27	.	0	0	0	0	.	.	.	.	.	.	.	.	.	.	.	.	.	.	.	.	.	Worker	2	0	0	0	0	0	0	0
12	28	.	0	0	0	0	.	.	.	.	.	.	.	.	.	.	.	.	.	.	.	.	.	Worker	1	0	0	0	0	0	0	0
13	29	.	0	0	0	0	.	.	.	.	.	.	.	.	.	.	.	.	.	.	.	.	.	Worker	0	0	0	0	0	0	0	0
13	30	t148	1	0	1	0	S	S	S	S	S	S	S	S	S	S	S	S	S	S	S	R	R	Minor	.	0	0	0	0	0	0	0
13	31	.	0	0	0	0	.	.	.	.	.	.	.	.	.	.	.	.	.	.	.	.	.	Minor	.	0	0	0	0	0	0	0
14	32	.	0	0	0	0	.	.	.	.	.	.	.	.	.	.	.	.	.	.	.	.	.	Worker	0	0	0	0	0	0	0	0
14	33	.	0	0	0	0	.	.	.	.	.	.	.	.	.	.	.	.	.	.	.	.	.	Adult	.	0	0	0	0	0	0	0
14	34	t7226	1	0	1	0	S	S	S	S	S	S	S	S	S	S	S	S	S	S	S	R	R	Minor	.	0	0	0	0	0	0	0
15	35	t616	1	0	1	0	S	S	S	S	S	S	S	S	S	S	S	R	S	S	S	R	R	Worker	1	0	0	0	0	0	0	0
15	36	t065	1	0	1	1	S	S	R	S	R	S	S	S	S	S	S	S	S	S	S	R	R	Minor	.	0	0	0	0	0	0	0
16	37	.	0	0	0	0	.	.	.	.	.	.	.	.	.	.	.	.	.	.	.	.	.	Worker	0	0	0	0	0	0	0	0
17	38	t337	1	0	0	1	I	S	R	S	R	S	S	S	S	S	S	R	I	S	S	R	R	Worker	1	0	0	0	0	0	0	0
17	39	.	0	0	0	0	.	.	.	.	.	.	.	.	.	.	.	.	.	.	.	.	.	Worker	0	0	0	0	0	0	0	0
18	40	t189	1	0	0	0	S	S	S	S	S	S	S	S	S	S	S	S	S	S	S	R	R	Worker	1	0	0	0	0	0	0	0
19	41	t008	1	0	1	0	S	S	S	S	S	S	S	S	S	S	S	S	S	S	S	R	R	Worker	2	0	0	0	0	0	0	0
19	42	t5739	1	0	1	0	S	S	S	S	S	S	S	S	S	S	S	S	S	S	S	R	R	Minor	.	0	0	0	0	0	0	0
19	43	t3446	1	0	0	0	S	S	S	S	S	S	S	S	S	S	S	S	S	S	S	R	R	Worker	1	0	0	0	1	0	0	1
19	44	t5739	1	0	1	0	S	S	S	S	S	S	S	S	S	S	S	S	S	S	S	R	R	Minor	.	0	0	0	0	0	0	0
20	45	.	0	0	0	0	.	.	.	.	.	.	.	.	.	.	.	.	.	.	.	.	.	Worker	0	0	0	0	0	0	0	0
20	46	.	0	0	0	0	.	.	.	.	.	.	.	.	.	.	.	.	.	.	.	.	.	Minor	.	0	0	0	0	0	0	0
21	47	.	0	0	0	0	.	.	.	.	.	.	.	.	.	.	.	.	.	.	.	.	.	Worker	0	0	0	0	0	0	0	0
21	48	.	0	0	0	0	.	.	.	.	.	.	.	.	.	.	.	.	.	.	.	.	.	Adult	.	0	0	0	0	0	0	0
21	49	.	0	0	0	0	.	.	.	.	.	.	.	.	.	.	.	.	.	.	.	.	.	Minor	.	0	0	0	0	0	0	0
22	50	t616	1	0	0	1	S	S	R	S	R	S	S	S	S	S	S	R	I	S	S	R	R	Worker	.	0	0	0	0	0	.	0
23	51	.	0	0	0	0	.	.	.	.	.	.	.	.	.	.	.	.	.	.	.	.	.	Worker	1	0	0	0	0	0	0	0
23	52	.	0	0	0	0	.	.	.	.	.	.	.	.	.	.	.	.	.	.	.	.	.	Worker	1	0	0	0	0	0	0	0
23	53	.	0	0	0	0	.	.	.	.	.	.	.	.	.	.	.	.	.	.	.	.	.	Minor	.	0	0	0	0	0	0	0
24	54	.	0	0	0	0	.	.	.	.	.	.	.	.	.	.	.	.	.	.	.	.	.	Worker	1	0	0	0	0	0	0	0
24	55	.	0	0	0	0	.	.	.	.	.	.	.	.	.	.	.	.	.	.	.	.	.	Adult	.	0	0	0	0	0	0	0
24	56	.	0	0	0	0	.	.	.	.	.	.	.	.	.	.	.	.	.	.	.	.	.	Minor	.	0	0	0	0	0	0	0
25	57	.	0	0	0	0	.	.	.	.	.	.	.	.	.	.	.	.	.	.	.	.	.	Worker	0	0	0	0	0	0	0	0
25	58	.	0	0	0	0	.	.	.	.	.	.	.	.	.	.	.	.	.	.	.	.	.	Worker	1	0	0	0	0	0	0	0
25	59	t034	1	0	0	1	S	S	R	S	R	S	S	S	S	S	S	R	I	S	S	R	R	Minor	.	0	0	0	0	0	0	0
26	60	t337	1	0	0	1	I	S	R	S	R	R	S	S	S	S	S	R	S	S	S	R	R	Worker	2	0	0	0	0	0	0	0
26	61	.	0	0	0	0	.	.	.	.	.	.	.	.	.	.	.	.	.	.	.	.	.	Adult	.	0	0	0	0	0	0	0
26	62	.	0	0	0	0	.	.	.	.	.	.	.	.	.	.	.	.	.	.	.	.	.	Minor	.	0	0	0	0	0	0	0
27	63	t7226	1	0	1	0	S	S	S	S	S	S	S	S	S	S	S	S	S	S	S	R	R	Worker	2	0	0	0	0	0	0	0
27	64	.	0	0	0	0	.	.	.	.	.	.	.	.	.	.	.	.	.	.	.	.	.	Minor	.	0	0	0	0	0	0	0
27	65	t034	1	0	0	1	S	S	R	S	R	S	S	S	S	S	S	R	I	S	S	R	R	Worker	1	0	.	.	.	.	0	0
27	66	t7226	1	0	1	0	S	S	S	S	S	S	S	S	S	S	S	S	S	S	S	R	R	Minor	.	0	0	0	0	0	0	0
28	67	t065	1	0	1	1	S	S	R	S	R	S	S	S	S	S	S	S	S	S	S	R	R	Worker	1	0	0	0	0	0	0	0
28	68	.	0	0	0	0	.	.	.	.	.	.	.	.	.	.	.	.	.	.	.	.	.	Adult	.	0	0	0	0	0	0	0
28	69	t189	1	0	1	0	S	S	S	S	S	S	S	S	S	S	S	S	S	S	S	S	S	Minor	.	0	0	0	0	0	0	0
29	70	t233	1	0	1	0	S	S	S	S	S	S	S	S	S	S	S	S	S	S	S	R	R	Worker	1	0	0	0	0	0	0	0
29	71	t233	1	0	1	0	S	S	S	S	S	S	S	S	S	S	S	S	S	S	S	R	R	Minor	.	0	0	0	0	1	0	1
29	72	.	0	0	0	0	.	.	.	.	.	.	.	.	.	.	.	.	.	.	.	.	.	Worker	1	0	0	0	0	0	0	0
29	73	.	0	0	0	0	.	.	.	.	.	.	.	.	.	.	.	.	.	.	.	.	.	Minor	.	0	0	0	0	88888	0	0
30	74	.	0	0	0	0	.	.	.	.	.	.	.	.	.	.	.	.	.	.	.	.	.	Worker	0	0	0	0	0	0	0	0
30	75	.	0	0	0	0	.	.	.	.	.	.	.	.	.	.	.	.	.	.	.	.	.	Minor	.	0	0	0	0	0	0	0
30	76	.	0	0	0	0	.	.	.	.	.	.	.	.	.	.	.	.	.	.	.	.	.	Worker	0	0	0	0	0	0	0	0
30	77	t346	1	0	1	0	S	S	S	S	S	S	S	S	S	S	S	S	S	S	S	R	R	Minor	.	0	0	0	0	0	0	0
31	78	.	0	0	0	0	.	.	.	.	.	.	.	.	.	.	.	.	.	.	.	.	.	Worker	1	0	0	0	0	0	0	0
32	79	t008	1	0	1	1	S	S	R	S	R	R	S	S	S	S	S	S	S	S	S	R	R	Worker	1	0	0	0	1	0	1	1
32	80	.	0	0	0	0	.	.	.	.	.	.	.	.	.	.	.	.	.	.	.	.	.	Minor	.	0	0	0	0	0	1	1
33	81	t659	1	0	1	1	S	S	R	S	R	S	S	S	S	S	S	S	S	S	S	R	R	Worker	2	0	0	0	0	0	0	0
33	82	t659	1	0	1	1	S	S	R	S	R	S	S	S	S	S	S	S	S	S	S	R	R	Adult	.	0	.	.	.	.	0	0
34	83	.	0	0	0	0	.	.	.	.	.	.	.	.	.	.	.	.	.	.	.	.	.	Adult	.	0	0	0	0	0	0	0
35	84	.	0	0	0	0	.	.	.	.	.	.	.	.	.	.	.	.	.	.	.	.	.	Worker	1	0	0	0	0	0	0	0
35	85	.	0	0	0	0	.	.	.	.	.	.	.	.	.	.	.	.	.	.	.	.	.	Adult	.	0	0	0	0	0	0	0
35	86	.	0	0	0	0	.	.	.	.	.	.	.	.	.	.	.	.	.	.	.	.	.	Minor	.	0	0	0	0	1	0	1
36	87	.	0	0	0	0	.	.	.	.	.	.	.	.	.	.	.	.	.	.	.	.	.	Worker	2	0	0	0	0	0	0	0
36	88	.	0	0	0	0	.	.	.	.	.	.	.	.	.	.	.	.	.	.	.	.	.	Minor	.	0	0	0	0	0	0	0
37	89	.	0	0	0	0	.	.	.	.	.	.	.	.	.	.	.	.	.	.	.	.	.	Worker	1	0	0	0	0	0	0	0
37	90	.	0	0	0	0	.	.	.	.	.	.	.	.	.	.	.	.	.	.	.	.	.	Adult	.	0	0	0	0	0	0	0
37	91	.	0	0	0	0	.	.	.	.	.	.	.	.	.	.	.	.	.	.	.	.	.	Minor	.	0	0	0	0	0	0	0
38	92	.	0	0	0	0	.	.	.	.	.	.	.	.	.	.	.	.	.	.	.	.	.	Worker	1	0	0	0	0	0	0	0
38	93	t150	1	0	1	0	S	S	S	S	S	S	S	S	S	S	S	S	S	S	S	S	S	Worker	1	0	0	0	0	0	0	0
39	94	t034	1	0	0	1	S	S	R	S	R	S	S	S	S	S	S	R	I	S	S	R	R	Worker	1	0	0	0	0	0	0	0
39	95	.	0	0	0	0	.	.	.	.	.	.	.	.	.	.	.	.	.	.	.	.	.	Minor	.	0	0	0	0	0	0	0
40	96	.	0	0	0	0	.	.	.	.	.	.	.	.	.	.	.	.	.	.	.	.	.	Worker	0	0	0	0	0	0	0	0
40	97	.	0	0	0	0	.	.	.	.	.	.	.	.	.	.	.	.	.	.	.	.	.	Minor	.	0	0	0	0	0	0	0
41	98	.	0	0	0	0	.	.	.	.	.	.	.	.	.	.	.	.	.	.	.	.	.	Worker	0	0	0	0	0	0	0	0
41	99	.	0	0	0	0	.	.	.	.	.	.	.	.	.	.	.	.	.	.	.	.	.	Adult	.	0	0	0	0	0	0	0
41	100	.	0	0	0	0	.	.	.	.	.	.	.	.	.	.	.	.	.	.	.	.	.	Minor	.	0	0	0	0	0	0	0
42	101	t4976	1	0	1	1	S	S	R	S	R	S	S	S	S	S	S	R	S	S	S	R	R	Worker	1	0	0	0	1	0	0	1
42	102	t6228	1	0	0	0	S	S	S	S	S	S	S	S	S	S	S	R	I	S	S	R	R	Worker	1	0	0	0	0	0	0	0
42	103	t4976	1	0	1	0	S	S	S	S	S	S	S	S	S	S	S	S	S	S	S	S	S	Minor	.	0	0	0	1	0	0	1
43	104	.	0	0	0	0	.	.	.	.	.	.	.	.	.	.	.	.	.	.	.	.	.	Worker	1	0	0	0	0	0	0	0
43	105	.	0	0	0	0	.	.	.	.	.	.	.	.	.	.	.	.	.	.	.	.	.	Adult	.	0	0	0	0	0	0	0
44	106	t692	1	0	1	0	S	S	S	S	S	S	S	S	S	S	S	S	S	S	S	R	R	Worker	1	0	0	0	0	0	0	0
44	107	.	0	0	0	0	.	.	.	.	.	.	.	.	.	.	.	.	.	.	.	.	.	Worker	2	0	0	0	0	0	0	0
44	108	.	0	0	0	0	.	.	.	.	.	.	.	.	.	.	.	.	.	.	.	.	.	Worker	2	0	0	0	0	0	0	0
45	109	t065	1	0	1	1	S	S	R	S	R	S	S	S	S	S	S	S	S	S	S	R	R	Worker	0	0	0	0	0	0	0	0
45	110	t622	1	0	0	0	S	S	S	S	S	S	S	S	S	S	S	S	S	S	S	R	R	Worker	0	0	0	0	0	0	0	0
46	111	.	0	0	0	0	.	.	.	.	.	.	.	.	.	.	.	.	.	.	.	.	.	Worker	1	0	0	0	0	0	0	0
46	112	.	0	0	0	0	.	.	.	.	.	.	.	.	.	.	.	.	.	.	.	.	.	Worker	0	0	0	0	0	0	0	0
47	113	t150	1	0	1	0	S	S	S	S	S	S	S	S	S	S	S	S	S	S	S	S	S	Worker	1	0	0	0	0	0	0	0
47	114	.	0	0	0	0	.	.	.	.	.	.	.	.	.	.	.	.	.	.	.	.	.	Adult	.	0	0	0	0	0	0	0
48	115	.	0	0	0	0	.	.	.	.	.	.	.	.	.	.	.	.	.	.	.	.	.	Worker	0	0	0	0	0	0	0	0
49	116	t701	1	0	1	0	S	S	S	S	S	S	S	S	S	S	S	R	S	S	S	R	R	Worker	0	0	0	0	0	0	0	0
49	117	t701	1	0	1	0	S	S	S	S	S	S	S	S	S	S	S	R	S	S	S	R	R	Adult	.	0	0	0	0	0	0	0
49	118	t2868	1	0	1	1	S	S	R	S	R	S	S	S	S	S	S	S	S	S	S	R	R	Minor	.	0	0	0	0	0	0	0
50	119	.	0	0	0	0	.	.	.	.	.	.	.	.	.	.	.	.	.	.	.	.	.	Worker	1	0	0	0	0	0	0	0
51	120	t701	1	0	1	0	S	S	S	S	S	S	S	S	S	S	S	S	S	S	S	R	R	Worker	0	0	0	0	0	0	0	0
52	121	.	0	0	0	0	.	.	.	.	.	.	.	.	.	.	.	.	.	.	.	.	.	Worker	1	0	0	0	0	0	0	0
52	122	t5883	1	1	0	1	S	R	S	S	S	S	S	S	S	S	S	R	I	S	R	R	R	Worker	1	0	0	0	0	0	0	0
53	123	.	0	0	0	0	.	.	.	.	.	.	.	.	.	.	.	.	.	.	.	.	.	Worker	1	0	0	0	0	0	0	0
53	124	t091	1	0	1	0	S	S	S	S	S	S	S	S	S	S	S	S	S	S	S	R	R	Minor	.	0	0	0	0	0	0	0
53	125	.	0	0	0	0	.	.	.	.	.	.	.	.	.	.	.	.	.	.	.	.	.	Minor	.	0	0	0	0	.	0	0
54	126	t3270	1	0	0	1	I	S	R	S	R	R	S	S	S	S	S	R	R	S	S	R	R	Worker	1	0	0	0	0	0	0	0
55	127	.	0	0	0	0	.	.	.	.	.	.	.	.	.	.	.	.	.	.	.	.	.	Worker	0	0	0	0	0	0	0	0
55	128	.	0	0	0	0	.	.	.	.	.	.	.	.	.	.	.	.	.	.	.	.	.	Worker	1	0	0	0	0	0	0	0
55	129	.	0	0	0	0	.	.	.	.	.	.	.	.	.	.	.	.	.	.	.	.	.	Minor	.	0	0	0	0	0	0	0
56	130	.	0	0	0	0	.	.	.	.	.	.	.	.	.	.	.	.	.	.	.	.	.	Worker	0	0	0	0	0	0	0	0
56	131	.	0	0	0	0	.	.	.	.	.	.	.	.	.	.	.	.	.	.	.	.	.	Adult	.	0	0	0	0	0	0	0
56	132	t10119	1	0	1	0	S	S	S	S	S	S	S	S	S	S	S	S	S	S	S	R	R	Minor	.	0	0	0	0	0	0	0
56	133	.	0	0	0	0	.	.	.	.	.	.	.	.	.	.	.	.	.	.	.	.	.	Minor	.	0	0	0	0	0	0	0
57	134	.	0	0	0	0	.	.	.	.	.	.	.	.	.	.	.	.	.	.	.	.	.	Worker	2	0	0	0	0	0	0	0
58	135	t337	1	0	0	0	S	S	S	S	S	S	S	S	S	S	S	R	S	S	S	R	R	Worker	0	0	0	0	0	0	0	0
58	136	t337	1	0	0	0	S	S	S	S	S	S	S	S	S	S	S	S	S	S	S	R	R	Worker	0	0	0	0	0	0	0	0
58	137	t091	1	0	1	0	S	S	S	S	S	S	S	S	S	S	S	S	S	S	S	R	R	Minor	.	0	0	0	0	0	0	0
59	138	.	0	0	0	0	.	.	.	.	.	.	.	.	.	.	.	.	.	.	.	.	.	Worker	2	0	0	0	0	0	0	0
59	139	.	0	0	0	0	.	.	.	.	.	.	.	.	.	.	.	.	.	.	.	.	.	Adult	.	0	0	0	0	0	0	0
60	140	t692	1	0	1	0	S	S	S	S	S	S	S	S	S	S	S	S	S	S	S	R	R	Worker	1	0	0	0	0	0	0	0
61	141	.	0	0	0	0	.	.	.	.	.	.	.	.	.	.	.	.	.	.	.	.	.	Worker	0	0	0	0	0	0	0	0
61	142	.	0	0	0	0	.	.	.	.	.	.	.	.	.	.	.	.	.	.	.	.	.	Adult	.	0	0	0	0	0	0	0
61	143	t031	1	0	1	0	S	S	S	S	S	S	S	S	S	S	S	S	S	S	S	R	R	Minor	.	0	0	0	1	.	0	1
62	144	.	0	0	0	0	.	.	.	.	.	.	.	.	.	.	.	.	.	.	.	.	.	Worker	0	0	0	0	0	0	0	0
63	145	.	0	0	0	0	.	.	.	.	.	.	.	.	.	.	.	.	.	.	.	.	.	Worker	0	0	0	0	0	0	0	0
64	146	.	0	0	0	0	.	.	.	.	.	.	.	.	.	.	.	.	.	.	.	.	.	Worker	1	0	0	0	0	0	0	0
64	147	.	0	0	0	0	.	.	.	.	.	.	.	.	.	.	.	.	.	.	.	.	.	Worker	1	0	0	0	0	0	0	0
64	148	.	0	0	0	0	.	.	.	.	.	.	.	.	.	.	.	.	.	.	.	.	.	Minor	.	0	0	0	0	0	0	0
65	149	.	0	0	0	0	.	.	.	.	.	.	.	.	.	.	.	.	.	.	.	.	.	Worker	2	0	0	0	0	0	0	0
65	150	.	0	0	0	0	.	.	.	.	.	.	.	.	.	.	.	.	.	.	.	.	.	Worker	2	0	0	0	0	0	0	0
65	151	.	0	0	0	0	.	.	.	.	.	.	.	.	.	.	.	.	.	.	.	.	.	Minor	.	0	0	0	0	0	0	0
66	152	t031	1	0	1	1	S	S	R	S	R	S	S	S	S	S	S	R	I	S	S	R	R	Worker	2	0	0	0	0	0	0	0
66	153	.	1	0	0	1	S	S	R	S	R	S	S	S	S	S	S	I	R	S	S	R	R	Adult	.	0	0	0	0	0	0	0
67	154	t1446	1	0	0	1	S	S	R	S	R	S	S	S	S	S	S	R	I	S	S	R	R	Worker	.	0	0	0	0	0	.	0
68	155	.	0	0	0	0	.	.	.	.	.	.	.	.	.	.	.	.	.	.	.	.	.	Worker	2	0	0	0	0	1	0	1
68	156	.	0	0	0	0	.	.	.	.	.	.	.	.	.	.	.	.	.	.	.	.	.	Adult	.	0	0	0	0	0	0	0
69	157	.	0	0	0	0	.	.	.	.	.	.	.	.	.	.	.	.	.	.	.	.	.	Worker	0	0	0	0	0	0	0	0
70	158	.	0	0	0	0	.	.	.	.	.	.	.	.	.	.	.	.	.	.	.	.	.	Worker	1	0	0	0	0	0	0	0
71	159	t571	1	0	0	1	S	S	R	S	R	S	S	S	S	S	S	R	I	S	S	R	R	Worker	1	0	0	0	0	0	0	0
72	160	t1430	1	0	0	1	S	S	R	S	R	S	S	S	S	S	S	S	S	S	S	R	R	Worker	2	0	0	0	0	0	0	0
72	161	t034	1	0	0	1	S	S	R	S	R	S	S	S	S	S	S	R	I	S	S	R	R	Adult	.	0	0	0	0	0	0	0
72	162	.	0	0	0	0	.	.	.	.	.	.	.	.	.	.	.	.	.	.	.	.	.	Minor	.	0	0	0	0	0	0	0
73	163	t094	1	0	1	0	S	S	S	S	S	S	S	S	S	S	S	S	S	S	S	R	R	Worker	0	0	0	0	0	0	0	0
73	164	t094	1	0	1	0	S	S	S	S	S	S	S	S	S	S	S	S	S	S	S	R	R	Worker	0	0	0	0	0	0	0	0
73	165	t230	1	0	1	0	S	S	S	S	S	R	S	S	S	S	S	S	S	S	S	R	R	Minor	.	0	0	0	0	0	0	0
74	166	.	0	0	0	0	.	.	.	.	.	.	.	.	.	.	.	.	.	.	.	.	.	Worker	1	0	0	0	0	0	0	0
74	167	.	0	0	0	0	.	.	.	.	.	.	.	.	.	.	.	.	.	.	.	.	.	Adult	.	0	0	0	0	0	0	0
74	168	.	0	0	0	0	.	.	.	.	.	.	.	.	.	.	.	.	.	.	.	.	.	Adult	.	0	0	0	0	0	0	0
75	169	.	0	0	0	0	.	.	.	.	.	.	.	.	.	.	.	.	.	.	.	.	.	Worker	0	0	0	0	0	0	0	0
75	170	.	0	0	0	0	.	.	.	.	.	.	.	.	.	.	.	.	.	.	.	.	.	Adult	.	0	0	0	0	0	0	0
76	171	t337	1	0	0	1	S	S	R	S	R	S	S	S	S	S	S	I	S	S	S	R	R	Worker	1	0	0	0	0	0	0	0
76	172	t3802	1	0	1	0	S	S	S	S	S	S	S	S	S	S	S	S	S	S	S	R	R	Adult	.	0	0	0	0	0	0	0
76	173	.	0	0	0	0	.	.	.	.	.	.	.	.	.	.	.	.	.	.	.	.	.	Minor	.	0	0	0	0	0	0	0
77	174	.	0	0	0	0	.	.	.	.	.	.	.	.	.	.	.	.	.	.	.	.	.	Worker	1	0	0	0	0	0	0	0
77	175	.	0	0	0	0	.	.	.	.	.	.	.	.	.	.	.	.	.	.	.	.	.	Adult	.	0	0	0	0	0	0	0
78	176	.	0	0	0	0	.	.	.	.	.	.	.	.	.	.	.	.	.	.	.	.	.	Worker	0	0	0	0	0	0	0	0
79	177	t233	1	0	1	0	S	S	S	S	S	S	S	S	S	S	S	S	S	S	S	R	R	Worker	0	0	0	0	0	0	0	0
79	178	t7226	1	0	1	0	S	S	S	S	S	S	S	S	S	S	S	S	S	S	S	R	R	Minor	.	0	0	0	0	0	0	0
79	179	t233	1	0	1	0	S	S	S	S	S	S	S	S	S	S	S	S	S	S	S	R	R	Minor	.	0	0	0	0	0	0	0
80	180	.	0	0	0	0	.	.	.	.	.	.	.	.	.	.	.	.	.	.	.	.	.	Worker	0	0	0	0	0	0	0	0
81	181	t091	1	0	1	0	S	S	S	S	S	S	S	S	S	S	S	S	S	S	S	R	R	Worker	0	0	0	0	0	0	0	0
81	182	.	0	0	0	0	.	.	.	.	.	.	.	.	.	.	.	.	.	.	.	.	.	Minor	.	0	0	0	0	0	0	0
81	183	.	0	0	0	0	.	.	.	.	.	.	.	.	.	.	.	.	.	.	.	.	.	Minor	.	0	0	0	0	0	0	0

## Sheet: Variable codebook
Variable Name	Description	Coding, 88888 = don't know, . = missing
		Binary	Character	Numeric	Notes
HHID	Household ID			1
INDID	Individual ID			1
SpaType	spa type		1
Saureus	S. aureus	1
MRSA	MRSA	1
SCN	scn gene presence vs absence	1
MDRSA	Multidrug resistant; resistant to 3+ antibiotic class	1
MXF	Moxifloxacin resistant	1
CEF	Cefoxitin resistant	1
CLI	clindamycin resistant	1
Dap	daptomycin resistant	1
ERY	erythromycin resistant	1
GEN	gentamicin resistant	1
LZD	linezolid resistant	1
NIT	nitrofurantoin resistant	1
RIF	rifampin resistant	1
SYN	quinupristin/dalfopristin resistant	1
SXT	sulfamethoxazole/ trimethoprim resistant	1
TET	tetracycline resistant	1
MNO	minocycline resistant	1
VAN	vancomycin resistant	1
OXA	oxacillin resistant	1
AMP	ampilcilin resistant	1
PEN	penicillin resistant	1
Type	participant type		1		Worker, Adult, Minor
Mask	Frequency participant wears a mask at work			1	0=always; 1=sometimes; 2=never
Staph	Staph infection past three months	1
Boil	Skin boil past 3 months	1
Absces	Pus filled abscess past 3 months	1
Pimple	Red, painful, swollen skin bump or pimple past 3 months	1
Spider	Spider bite that is itchy and oozes liquid past 3 months	1
DocStaph	Doctor diagnosed staph infection	1
SSTI	SSTI symptoms in past three months (based on "Yes" to Staph, Boil, Absces, Pimple, Spider, or DocStaph)	1
